# Supplementary material for: Erbium: key to simultaneously achieving superior temperature-stability and high magnetic properties in 2 : 17-type permanent magnets
Source: Royal Society of Chemistry journal article supplement (doi:10.1039/d4mh01765j), 2025-01-01
Supplement: d4mh01765j1.pdf [file d4mh01765j1.pdf]

## Supplementary materials

# Erbium: Key to Simultaneously Achieving Superior Temperature-Stability and High Magnetic Properties in 2:17-type Permanent Magnets

Zan Long<sup>a</sup>, Chaoyue Zhang<sup>b</sup>, Yuqing Li<sup>a\*</sup>, Baoguo Zhang<sup>b</sup>, Mengying Bian<sup>a</sup>, Chong Ling<sup>a</sup>, Youning Kang<sup>a</sup>,  
Hongguo Zhang<sup>a</sup>, Qiong Wu<sup>a</sup>, Ming Yue<sup>a\*</sup>

<sup>a</sup>College of Materials Science and Engineering, Key Laboratory of Advanced Functional Materials, Ministry of  
Education of China, Beijing University of Technology, Beijing 100124, China

<sup>b</sup>Hangzhou Kede Magnetic Components Co., Ltd, Hangzhou 311500, China

\*Corresponding author. Email address: [yueming@bjut.edu.cn](mailto:yueming@bjut.edu.cn) (Ming Yue), [yqli@bjut.edu.cn](mailto:yqli@bjut.edu.cn) (Yuqing Li)

Tab. S1 Saturation magnetization intensity of RE<sub>2</sub>Co<sub>17</sub> phase with different rare earth elements

| Compound                             | $\mu_0 M_s / T$ |
|--------------------------------------|-----------------|
| Sm <sub>2</sub> Co <sub>17</sub>     | 1.22            |
| Gd <sub>2</sub> Co <sub>17</sub>     | 0.75            |
| Tb <sub>2</sub> Co <sub>17</sub>     | 0.66            |
| Dy <sub>2</sub> Co <sub>17</sub>     | 0.68            |
| Ho <sub>2</sub> Co <sub>17</sub>     | 0.84            |
| <b>Er<sub>2</sub>Co<sub>17</sub></b> | <b>0.91</b>     |
| Tm <sub>2</sub> Co <sub>17</sub>     | 1.21            |

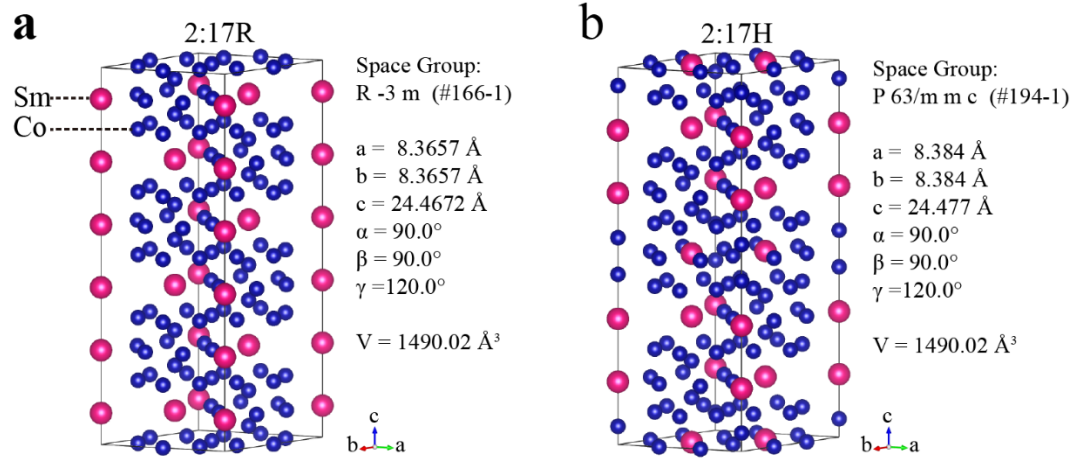

Fig. S1 2:17 phase supercell structure

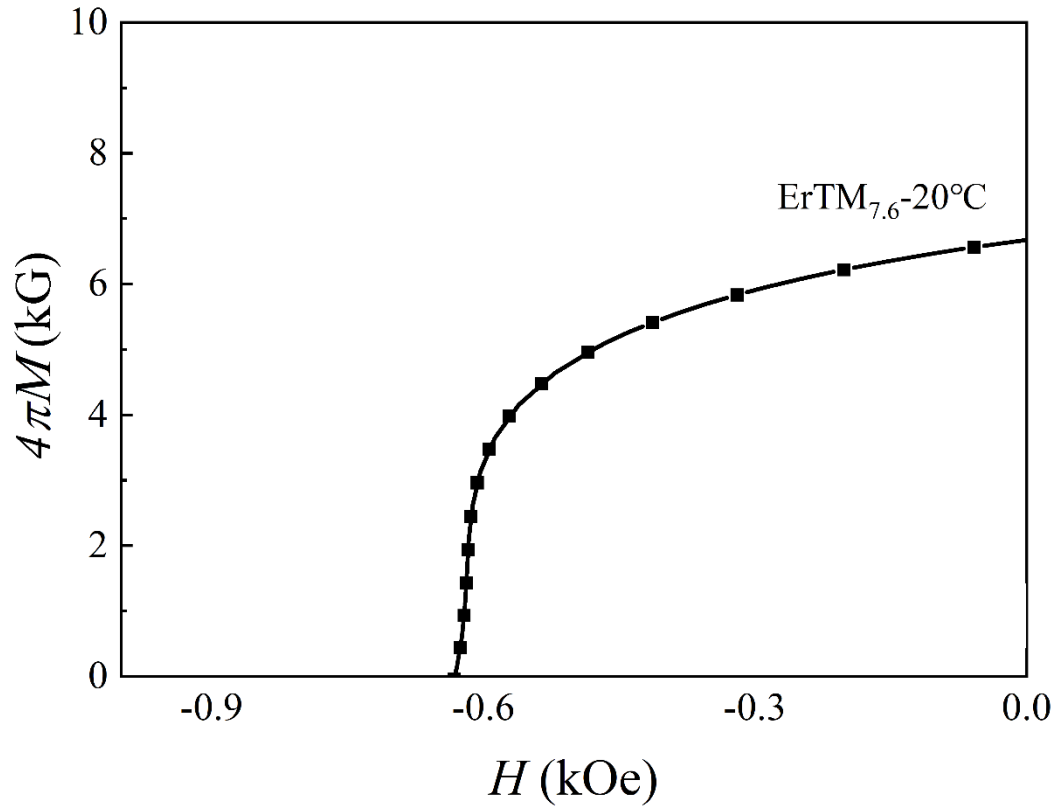

Fig. S2 Demagnetization curve of ErTM<sub>7.6</sub>(x=1) magnet.

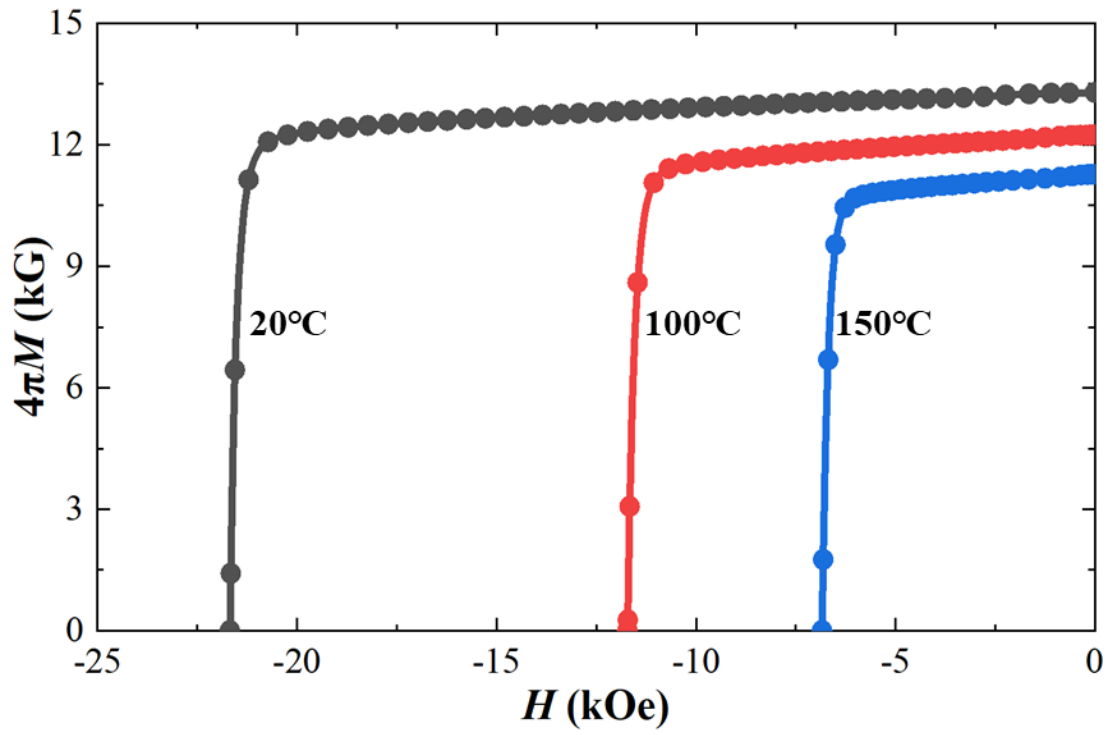

Fig. S3 Demagnetization curves at 20-150 °C of commercial Nd-Fe-B magnet obtained from Earth-Panda Advance Magnetic Material Co., Ltd.

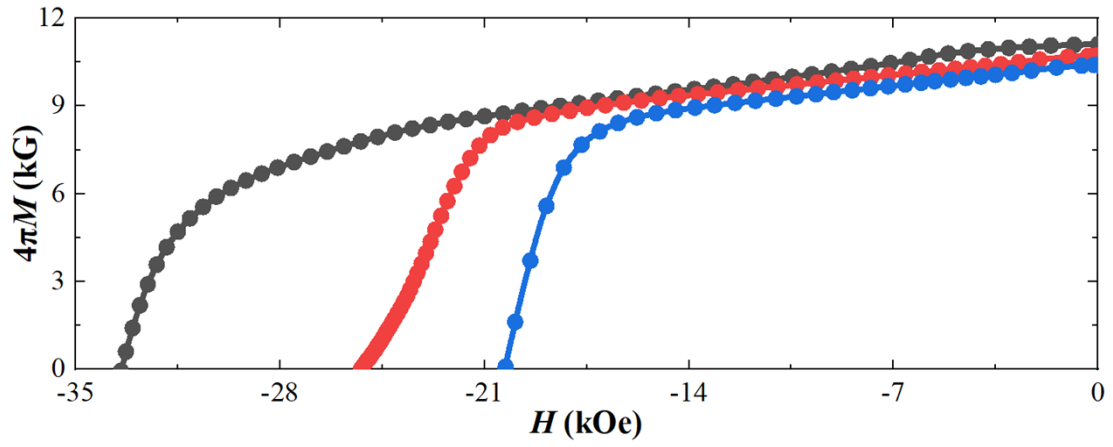

Fig. S4 Demagnetization curves at 20-150 °C of commercial Sm<sub>2</sub>Co<sub>17</sub>-type magnet purchased from Tianhe Magnetic Materials Technology Co., ltd.

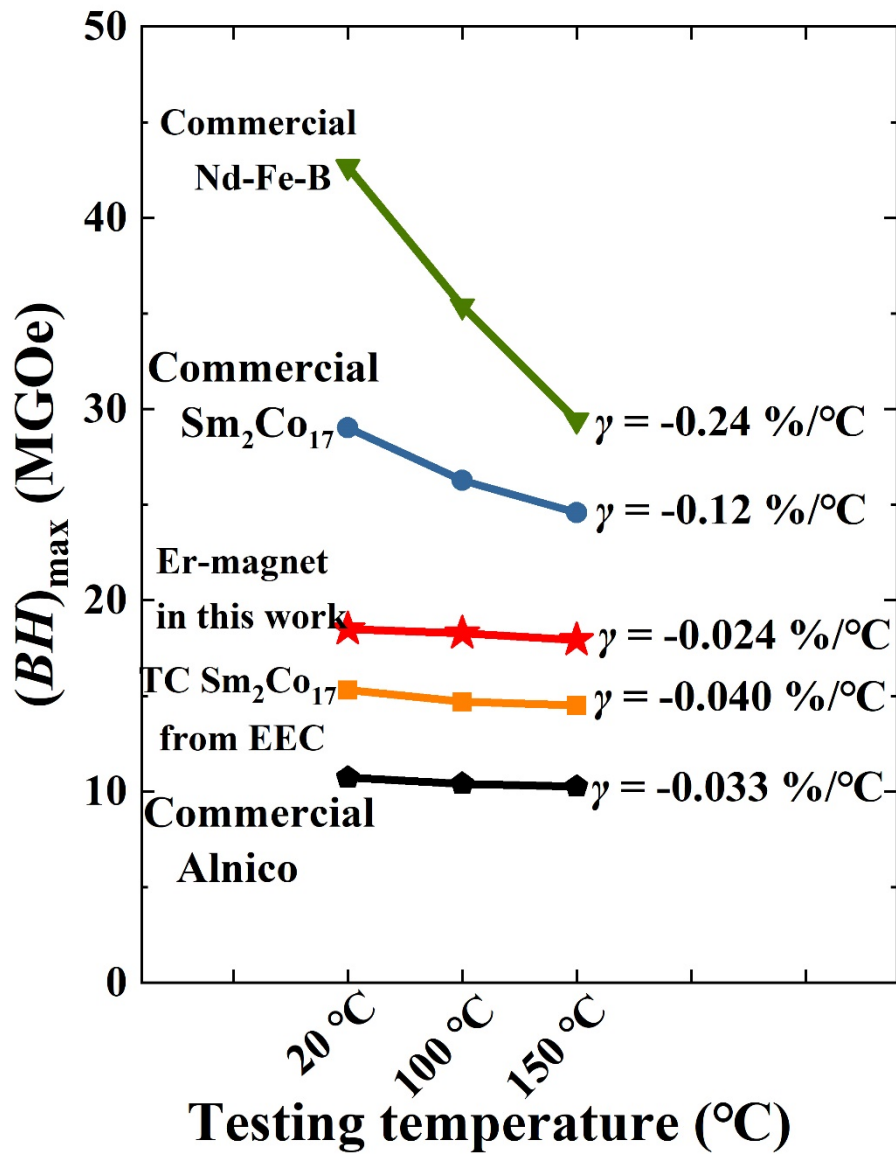

Fig. S5 The comparison of  $(BH)_{\max}$  at 20-150 °C of commercial Nd-Fe-B,  $\text{Sm}_2\text{Co}_{17}$ -type, TC  $\text{Sm}_2\text{Co}_{17}$ -type and Alnico magnets with the Er-magnet in this work, the corresponding  $\gamma_{20-150^\circ\text{C}}$ . The data of Alnico (brand CALNiCo80/12) magnet is from Hangzhou Kede Magnetic Components Co.,Ltd.

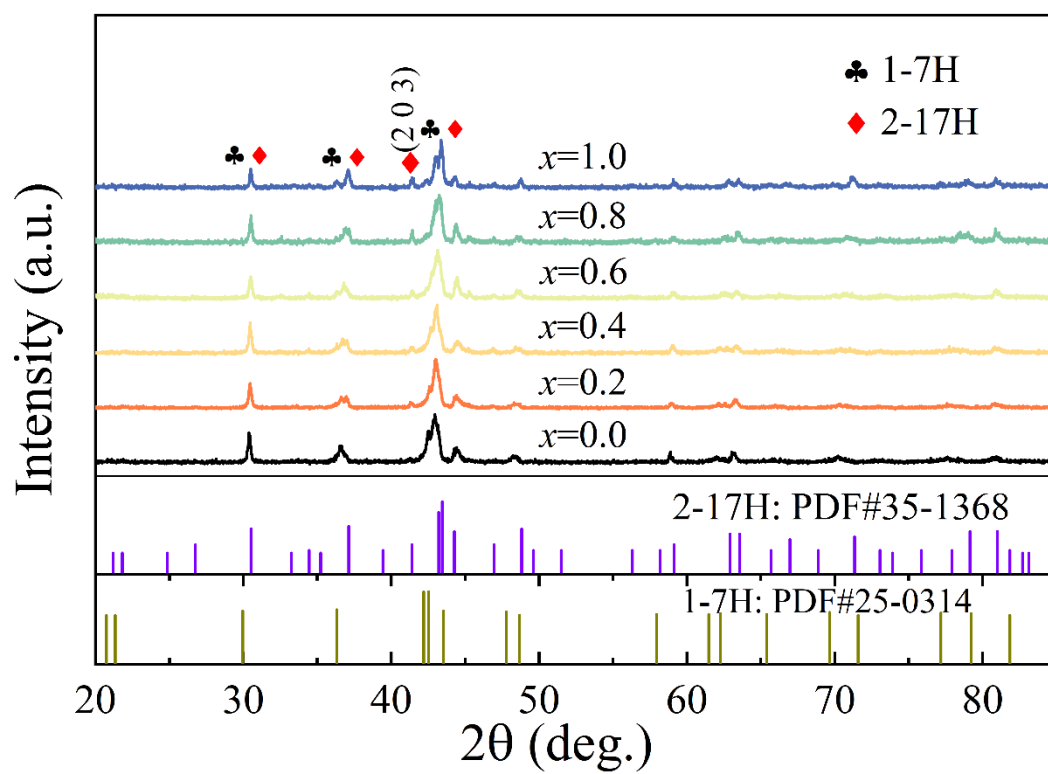

Fig. S6 XRD diffraction pattern of  $\text{Sm}_{1-x}\text{Er}_x\text{TM}_{7.6}$  ingots



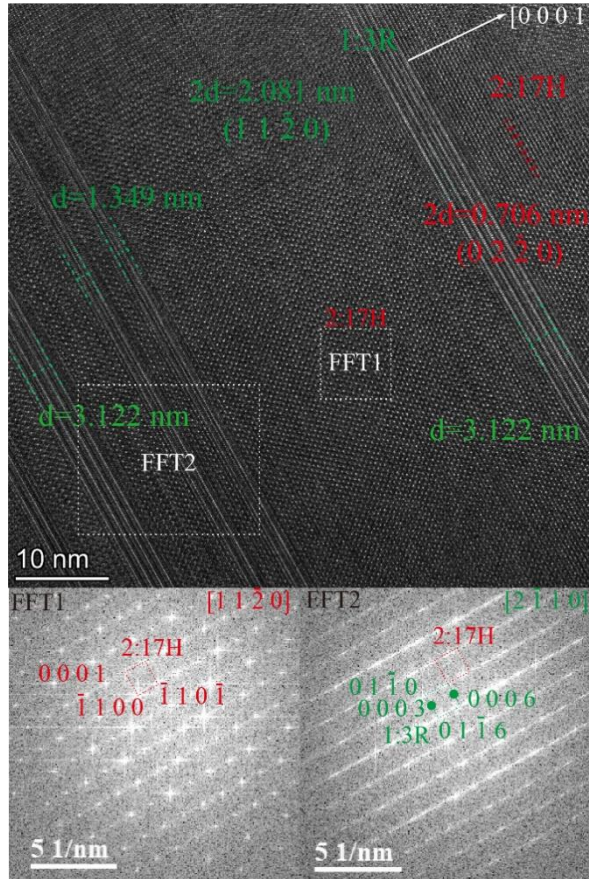

Fig. S7 HRTEM images of  $\text{ErTM}_{7.6}$  magnets and Fast Fourier Transform (FFT) patterns corresponding to the FFT1 and FFT2

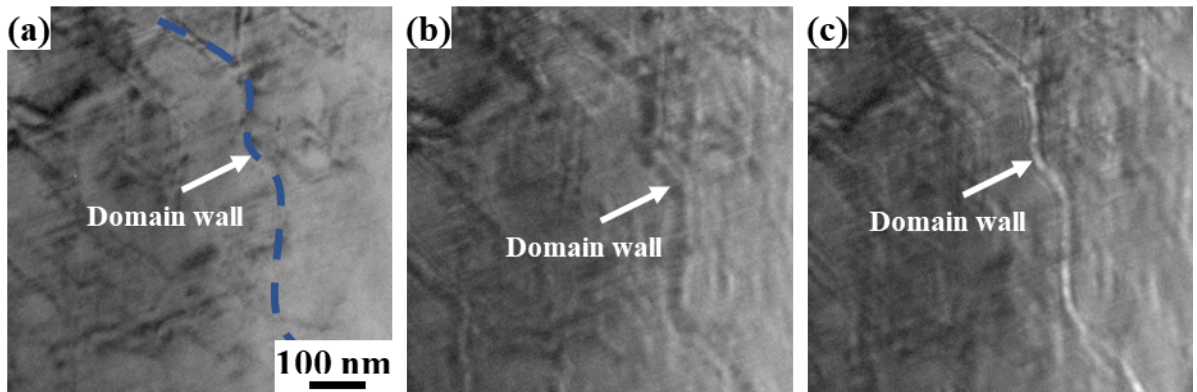

Fig. S8 LTEM images of  $\text{Sm}_{0.4}\text{Er}_{0.6}\text{TM}_{7.6}$  magnets. a-c are the bright field, over-focus, and under-focus images, respectively. The black and white traces in b and c indicate that this position is a magnetic domain wall, and the corresponding position is also marked with a dashed line in a.
